# Supplementary material
Source: PubMed Central journal article supplement (PMC59814)
Supplement: pnas_98_21_11857__1.pdf [file pnas_98_21_11857__1.pdf]

**Table 1.** Comparative molecular parameters and macroscopic properties of the aqueous solutions of the two *de novo* designed self-assembling  $\beta$ -tape-forming peptides P<sub>11</sub>-I and P<sub>11</sub>-II, shown schematically in a  $\beta$ -strand conformation.

|                                                          | Peptide P <sub>11</sub> -I |                        |                |                |               |                        |
|----------------------------------------------------------|----------------------------|------------------------|----------------|----------------|---------------|------------------------|
|                                                          | $\beta$ -Tapes             | Ribbons                | Fibrils        | $\beta$ -Tapes | Ribbons       | Fibrils                |
| <b><math>c_{cr} / \mu\text{M}</math></b>                 | 8*                         | 1,000*                 | $c > 25,000^*$ | $< 90^*$       | 90*           | $700 \pm 200^*$        |
| <b><math>\epsilon_{trans}</math></b>                     |                            | $6.5 \pm 1.5$          |                |                | $3 \pm 1$     |                        |
| <b><math>\epsilon_{tape}</math></b>                      | $31.0 \pm 1.5$             |                        |                | $24.5 \pm 1.0$ |               |                        |
| <b><math>\epsilon_{ribbon}</math></b>                    |                            | $(3.5 \pm 1.5)10^{-3}$ |                |                | $0.6 \pm 0.3$ |                        |
| <b><math>\epsilon_{fibril}</math></b>                    |                            |                        | $< 10^{-3}$    |                |               | $(2.0 \pm 0.3)10^{-4}$ |
| <b>Pitch <math>h / \text{nm}</math></b>                  | $30 \pm 15^*$              | $50 \pm 20^*$          |                |                | $160 \pm 40$  | $160 \pm 40^*$         |
| <b>Twist angle <math>\gamma_{\theta} / ^\circ</math></b> | 3*                         | 3*                     |                | 1              | 1             | 1*                     |
| <b>Bend angle <math>\gamma_{\psi} / ^\circ</math></b>    | 3*                         | 0*                     |                |                | 0*            | 0*                     |

|                                      |                                                                                        |                  |  |                                                                                                                                    |           |
|--------------------------------------|----------------------------------------------------------------------------------------|------------------|--|------------------------------------------------------------------------------------------------------------------------------------|-----------|
| $\tilde{l} / \mu\text{m}$            | $< 0.3^*$                                                                              | $0.6 \pm 0.2^*$  |  | $1.0 \pm 0.3^*$                                                                                                                    | $20-70^*$ |
| $L / \mu\text{m} (c = 6 \text{ mM})$ | $10^{-1}$                                                                              | $10^{-1} - 10^0$ |  | $10^{-3}$                                                                                                                          | $10^{17}$ |
| <b>Properties of aq. solution</b>    | Isotropic fluid ( $c < 13 \text{ mM}$ )<br>Nematic fluid / gel ( $c > 13 \text{ mM}$ ) |                  |  | Isotropic fluid ( $c < 0.9 \text{ mM}$ )<br>Nematic fluid ( $c \approx 0.9 - 6 \text{ mM}$ )<br>Nematic gel ( $c > 6 \text{ mM}$ ) |           |

Open and filled circles represent polar and apolar amino-acid residues, respectively. The upper side of the  $\beta$ -strand is identical for both peptides.  $c_{cr}$  is the threshold concentration above which the corresponding type of self-assembling structure emerges in substantial quantities. For explanation of the various energetic parameters  $\epsilon_j$ , see the text and Fig.1A. All values of  $\epsilon_j$  are given in  $k_B T$ . The errors in the values of  $\epsilon_j$  arise from the errors in the value of  $v_{\text{tape}}$ , and from the uncertainty of measurements of the real lengths of the polymers in solution at a given concentration. The values of  $\epsilon_{\text{trans}}$  and  $\epsilon_{\text{tape}}$  for both peptides, and  $\epsilon_{\text{ribbon}}$  for P<sub>11</sub>-II are received from the fits of the self-assembly curves (Figs. 2c in the text and 4c in supporting information), and the observed tape/ribbon lengths, with  $v_{\text{tape}} \approx 5 \cdot 10^{-6} \text{ nm}^3$  (this value is estimated from the observed persistence lengths of the ribbons).  $\epsilon_{\text{fibril}}$  is estimated from  $c_{cr}^{\text{fibril}}$  and  $\epsilon_{\text{ribbon}}$  for P<sub>11</sub>-I from the corresponding  $c_{cr}^{\text{ribbon}}$ .  $\tilde{l}$ ,  $h$ ,  $\gamma_v$ , and  $\gamma_\theta$  are either directly measured from electron micrographs or calculated with the help of the model similar to Fig.1B. Elastic constants are estimated from the observed persistence lengths of ribbons and fibrils. The contour lengths  $L$  agree with both the data and the predictions of the theory (see *Theoretical Model* in the text). Directly measured constants are indicated with an asterisk.
